# Supplementary material for: A Systematic Review of Candidate miRNAs, Its Targeted Genes and Pathways in Chronic Myeloid Leukemia–An Integrated Bioinformatical Analysis
Source: Front Oncol. 2022 Mar 7;12:848199. doi: 10.3389/fonc.2022.848199 (PMC8940286; doi:10.3389/fonc.2022.848199)
Supplement: Supplementary file 5 [file Table_5.xlsx]

## Sheet: cluster 1 predicted
Category	Term	Count	%	PValue	Genes	List Total	Pop Hits	Pop Total	Fold Enrichment	Bonferroni	Benjamini	FDR
GOTERM_CC_DIRECT	GO:0005576~extracellular region	11	100	2.82314e-11	COL3A1, ADAMTS2, SPARC, COL1A2, COL11A1, COL4A4, COL5A3, COL7A1, COL5A2, COL9A1, COL19A1	11	1610	18224	11.3193	7.90477e-10	1.97619e-10	1.97619e-10
GOTERM_BP_DIRECT	GO:0030198~extracellular matrix organization	10	90.9091	3.30751e-17	COL3A1, SPARC, COL1A2, COL11A1, COL4A4, COL5A3, COL7A1, COL5A2, COL9A1, COL19A1	11	196	16792	77.885	2.64601e-15	1.323e-15	1.24032e-15
GOTERM_BP_DIRECT	GO:0030574~collagen catabolic process	9	81.8182	1.26405e-18	COL3A1, ADAMTS2, COL1A2, COL11A1, COL4A4, COL5A3, COL7A1, COL5A2, COL19A1	11	64	16792	214.67	1.01124e-16	1.01124e-16	9.48034e-17
GOTERM_CC_DIRECT	GO:0005788~endoplasmic reticulum lumen	9	81.8182	5.7829e-15	COL3A1, COL1A2, COL11A1, COL4A4, COL5A3, COL7A1, COL5A2, COL9A1, COL19A1	11	192	18224	77.6591	1.61648e-13	1.61921e-13	1.61921e-13
KEGG_PATHWAY	hsa04974:Protein digestion and absorption	8	72.7273	4.40291e-14	COL3A1, COL1A2, COL11A1, COL4A4, COL5A3, COL7A1, COL5A2, COL9A1	8	88	6879	78.1705	3.08531e-13	3.52233e-13	3.52233e-13
GOTERM_CC_DIRECT	GO:0005578~proteinaceous extracellular matrix	8	72.7273	1.58992e-11	ADAMTS2, SPARC, COL1A2, COL11A1, COL4A4, COL5A2, COL9A1, COL19A1	11	268	18224	49.4545	4.4518e-10	1.48393e-10	1.48393e-10
GOTERM_MF_DIRECT	GO:0005201~extracellular matrix structural constituent	7	63.6364	6.44566e-13	COL3A1, COL1A2, COL11A1, COL4A4, COL5A3, COL5A2, COL19A1	11	67	16881	160.335	1.16027e-11	1.16022e-11	1.16022e-11
GOTERM_CC_DIRECT	GO:0005581~collagen trimer	7	63.6364	2.89828e-12	COL3A1, COL1A2, COL11A1, COL4A4, COL7A1, COL5A2, COL19A1	11	92	18224	126.055	8.11506e-11	4.05759e-11	4.05759e-11
GOTERM_BP_DIRECT	GO:0030199~collagen fibril organization	6	54.5455	1.2939e-11	COL3A1, ADAMTS2, COL1A2, COL11A1, COL5A3, COL5A2	11	39	16792	234.853	1.03512e-09	3.45039e-10	3.23474e-10
KEGG_PATHWAY	hsa04512:ECM-receptor interaction	6	54.5455	5.93391e-09	COL3A1, COL1A2, COL11A1, COL4A4, COL5A3, COL5A2	8	87	6879	59.3017	4.15374e-08	2.37357e-08	2.37357e-08
KEGG_PATHWAY	hsa05146:Amoebiasis	6	54.5455	1.61991e-08	COL3A1, COL1A2, COL11A1, COL4A4, COL5A3, COL5A2	8	106	6879	48.6722	1.13394e-07	4.31976e-08	4.31976e-08
KEGG_PATHWAY	hsa04510:Focal adhesion	6	54.5455	4.59094e-07	COL3A1, COL1A2, COL11A1, COL4A4, COL5A3, COL5A2	8	206	6879	25.0449	3.21366e-06	9.18189e-07	9.18189e-07
KEGG_PATHWAY	hsa04151:PI3K-Akt signaling pathway	6	54.5455	5.9585e-06	COL3A1, COL1A2, COL11A1, COL4A4, COL5A3, COL5A2	8	345	6879	14.9543	4.17087e-05	7.94466e-06	7.94466e-06
KEGG_PATHWAY	hsa04611:Platelet activation	5	45.4545	4.07998e-06	COL3A1, COL1A2, COL11A1, COL5A3, COL5A2	8	130	6879	33.0721	2.85595e-05	6.52797e-06	6.52797e-06
GOTERM_MF_DIRECT	GO:0046872~metal ion binding	5	45.4545	0.0256679	COL3A1, COL1A2, COL11A1, COL5A2, COL9A1	11	2069	16881	3.70864	0.373781	0.0770038	0.0770038
GOTERM_BP_DIRECT	GO:0043588~skin development	4	36.3636	9.01326e-07	COL3A1, ADAMTS2, COL5A3, COL5A2	11	34	16792	179.594	7.21035e-05	1.80265e-05	1.68999e-05
GOTERM_BP_DIRECT	GO:0001501~skeletal system development	4	36.3636	6.11381e-05	COL3A1, COL1A2, COL5A2, COL19A1	11	137	16792	44.5707	0.00487925	0.000978209	0.000917071
GOTERM_CC_DIRECT	GO:0031012~extracellular matrix	4	36.3636	0.000467716	COL3A1, COL1A2, COL7A1, COL5A2	11	296	18224	22.3882	0.0130137	0.00261921	0.00261921
GOTERM_CC_DIRECT	GO:0005615~extracellular space	4	36.3636	0.0326251	COL3A1, SPARC, COL1A2, COL7A1	11	1347	18224	4.91975	0.604948	0.130501	0.130501
GOTERM_MF_DIRECT	GO:0046332~SMAD binding	3	27.2727	0.000281535	COL3A1, COL1A2, COL5A2	11	43	16881	107.068	0.00505552	0.00253381	0.00253381
GOTERM_BP_DIRECT	GO:0071230~cellular response to amino acid stimulus	3	27.2727	0.000340157	COL3A1, COL1A2, COL5A2	11	47	16792	97.4391	0.0268502	0.00453543	0.00425196
GOTERM_MF_DIRECT	GO:0030674~protein binding, bridging	3	27.2727	0.000902508	COL1A2, COL11A1, COL19A1	11	77	16881	59.791	0.0161211	0.00541505	0.00541505
GOTERM_BP_DIRECT	GO:0001503~ossification	3	27.2727	0.000983981	SPARC, COL11A1, COL5A2	11	80	16792	57.2455	0.0757357	0.0112455	0.0105426
GOTERM_CC_DIRECT	GO:0005588~collagen type V trimer	2	18.1818	0.00164537	COL5A3, COL5A2	11	3	18224	1104.48	0.0450614	0.00767838	0.00767838
GOTERM_MF_DIRECT	GO:0048407~platelet-derived growth factor binding	2	18.1818	0.00649885	COL3A1, COL1A2	11	11	16881	279.025	0.110736	0.0292448	0.0292448
GOTERM_MF_DIRECT	GO:0050840~extracellular matrix binding	2	18.1818	0.0152997	SPARC, COL11A1	11	26	16881	118.049	0.242342	0.0550788	0.0550788
GOTERM_BP_DIRECT	GO:0035987~endodermal cell differentiation	2	18.1818	0.0159675	COL11A1, COL7A1	11	27	16792	113.077	0.724097	0.159675	0.149695
GOTERM_BP_DIRECT	GO:0034097~response to cytokine	2	18.1818	0.0305472	COL3A1, SPARC	11	52	16792	58.7133	0.916414	0.271531	0.25456
GOTERM_MF_DIRECT	GO:0005518~collagen binding	2	18.1818	0.034989	SPARC, COL5A3	11	60	16881	51.1545	0.473279	0.0899716	0.0899716
GOTERM_CC_DIRECT	GO:0005604~basement membrane	2	18.1818	0.0425238	SPARC, COL7A1	11	79	18224	41.9425	0.703801	0.148833	0.148833
GOTERM_BP_DIRECT	GO:0030324~lung development	2	18.1818	0.0443605	ADAMTS2, SPARC	11	76	16792	40.1722	0.973483	0.329051	0.308485
GOTERM_BP_DIRECT	GO:0042060~wound healing	2	18.1818	0.0466455	COL3A1, SPARC	11	80	16792	38.1636	0.978104	0.329051	0.308485

## Sheet: cluster 2 predicted
Category	Term	Count	%	PValue	Genes	List Total	Pop Hits	Pop Total	Fold Enrichment	Bonferroni	Benjamini	FDR
INTERPRO	IPR017970:Homeobox, conserved site	5	100	1.06448e-08	PBX3, HOXA7, HOXB7, HOXB6, HOXA5	5	190	18559	97.6789	8.51583e-08	2.83861e-08	2.83861e-08
UP_KEYWORDS	Homeobox	5	100	2.56729e-08	PBX3, HOXA7, HOXB7, HOXB6, HOXA5	5	262	20581	78.5534	2.82402e-07	2.82402e-07	2.82402e-07
INTERPRO	IPR001356:Homeodomain	5	100	3.53717e-08	PBX3, HOXA7, HOXB7, HOXB6, HOXA5	5	256	18559	72.4961	2.82974e-07	7.07435e-08	7.07435e-08
INTERPRO	IPR009057:Homeodomain-like	5	100	1.05559e-07	PBX3, HOXA7, HOXB7, HOXB6, HOXA5	5	336	18559	55.2351	8.44475e-07	1.68895e-07	1.68895e-07
SMART	SM00389:HOX	5	100	3.7297e-07	PBX3, HOXA7, HOXB7, HOXB6, HOXA5	5	250	10057	40.228	3.7297e-07	3.7297e-07	3.7297e-07
GOTERM_MF_DIRECT	GO:0043565~sequence-specific DNA binding	5	100	8.76676e-07	PBX3, HOXA7, HOXB7, HOXB6, HOXA5	5	518	16881	32.5888	8.76672e-06	8.76676e-06	8.76676e-06
UP_KEYWORDS	DNA-binding	5	100	9.81758e-05	PBX3, HOXA7, HOXB7, HOXB6, HOXA5	5	2050	20581	10.0395	0.0010794	0.000505712	0.000505712
UP_KEYWORDS	Transcription regulation	5	100	0.000164459	PBX3, HOXA7, HOXB7, HOXB6, HOXA5	5	2332	20581	8.82547	0.00180756	0.000505712	0.000505712
UP_KEYWORDS	Transcription	5	100	0.000183895	PBX3, HOXA7, HOXB7, HOXB6, HOXA5	5	2398	20581	8.58257	0.00202099	0.000505712	0.000505712
UP_KEYWORDS	Nucleus	5	100	0.00421128	PBX3, HOXA7, HOXB7, HOXB6, HOXA5	5	5244	20581	3.92468	0.0453609	0.00772069	0.00772069
GOTERM_CC_DIRECT	GO:0005634~nucleus	5	100	0.00778898	PBX3, HOXA7, HOXB7, HOXB6, HOXA5	5	5415	18224	3.36547	0.0307938	0.0311559	0.0311559
INTERPRO	IPR017995:Homeobox protein, antennapedia type	4	80	8.25814e-10	HOXA7, HOXB7, HOXB6, HOXA5	5	12	18559	1237.27	6.60651e-09	6.60651e-09	6.60651e-09
INTERPRO	IPR001827:Homeobox protein, antennapedia type, conserved site	4	80	4.27784e-09	HOXA7, HOXB7, HOXB6, HOXA5	5	20	18559	742.36	3.42227e-08	1.71113e-08	1.71113e-08
UP_SEQ_FEATURE	short sequence motif:Antp-type hexapeptide	4	80	5.25996e-09	HOXA7, HOXB7, HOXB6, HOXA5	5	23	20063	697.843	7.88994e-08	8.41593e-08	8.41593e-08
GOTERM_BP_DIRECT	GO:0048704~embryonic skeletal system morphogenesis	4	80	4.62574e-08	HOXA7, HOXB7, HOXB6, HOXA5	5	39	16792	344.451	2.12784e-06	2.12784e-06	2.12784e-06
GOTERM_BP_DIRECT	GO:0009952~anterior/posterior pattern specification	4	80	4.15093e-07	HOXA7, HOXB7, HOXB6, HOXA5	5	80	16792	167.92	1.90941e-05	9.54714e-06	9.54714e-06
INTERPRO	IPR020479:Homeodomain, metazoa	4	80	4.69865e-07	HOXA7, HOXB7, HOXB6, HOXA5	5	92	18559	161.383	3.75891e-06	6.26487e-07	6.26487e-07
UP_SEQ_FEATURE	DNA-binding region:Homeobox	4	80	3.37383e-06	HOXA7, HOXB7, HOXB6, HOXA5	5	191	20063	84.0335	5.06062e-05	2.69906e-05	2.69906e-05
UP_KEYWORDS	Developmental protein	4	80	0.000377494	HOXA7, HOXB7, HOXB6, HOXA5	5	949	20581	17.3496	0.00414461	0.000830487	0.000830487
GOTERM_MF_DIRECT	GO:0003700~transcription factor activity, sequence-specific DNA binding	4	80	0.000704471	PBX3, HOXB7, HOXB6, HOXA5	5	961	16881	14.0529	0.00702241	0.00352235	0.00352235
GOTERM_BP_DIRECT	GO:0006366~transcription from RNA polymerase II promoter	3	60	0.0053651	PBX3, HOXA7, HOXA5	5	513	16792	19.6398	0.219218	0.0822648	0.0822648
GOTERM_BP_DIRECT	GO:0045944~positive regulation of transcription from RNA polymerase II promoter	3	60	0.0189024	PBX3, HOXA7, HOXA5	5	981	16792	10.2703	0.584318	0.217378	0.217378

## Sheet: cluster 3 predicted
Category	Term	Count	%	PValue	Genes	List Total	Pop Hits	Pop Total	Fold Enrichment	Bonferroni	Benjamini	FDR
KEGG_PATHWAY	hsa04068:FoxO signaling pathway	3	75	0.00111557	FOXG1, AKT3, FOXO1	4	134	6879	38.5019	0.0741262	0.0769744	0.0769744
KEGG_PATHWAY	hsa05200:Pathways in cancer	3	75	0.0093979	AKT3, FOXO1, VEGFA	4	393	6879	13.1279	0.478748	0.324227	0.324227
UP_SEQ_FEATURE	mutagenesis site	3	75	0.0331617	FOXG1, AKT3, FOXO1	4	2191	20063	6.86775	0.539597	0.397941	0.397941
UP_SEQ_FEATURE	DNA-binding region:Fork-head	2	50	0.0074582	FOXG1, FOXO1	4	50	20063	200.63	0.158174	0.178997	0.178997
INTERPRO	IPR001766:Transcription factor, fork head	2	50	0.00790022	FOXG1, FOXO1	4	49	18559	189.378	0.0979728	0.102703	0.102703
SMART	SM00339:FH	2	50	0.014547	FOXG1, FOXO1	4	49	10057	102.622	0.0706495	0.0727351	0.0727351
KEGG_PATHWAY	hsa04370:VEGF signaling pathway	2	50	0.0263713	AKT3, VEGFA	4	61	6879	56.3852	0.841823	0.330545	0.330545
KEGG_PATHWAY	hsa05212:Pancreatic cancer	2	50	0.0280842	AKT3, VEGFA	4	65	6879	52.9154	0.85992	0.330545	0.330545
KEGG_PATHWAY	hsa05211:Renal cell carcinoma	2	50	0.0285121	AKT3, VEGFA	4	66	6879	52.1136	0.864112	0.330545	0.330545
GOTERM_MF_DIRECT	GO:0000981~RNA polymerase II transcription factor activity, sequence-specific DNA binding	2	50	0.0300842	FOXG1, FOXO1	4	171	16881	49.3596	0.58763	0.872441	0.872441
INTERPRO	IPR011991:Winged helix-turn-helix DNA-binding domain	2	50	0.03751	FOXG1, FOXO1	4	235	18559	39.4872	0.391653	0.243815	0.243815
KEGG_PATHWAY	hsa05215:Prostate cancer	2	50	0.0378943	AKT3, FOXO1	4	88	6879	39.0852	0.930438	0.330545	0.330545
KEGG_PATHWAY	hsa04066:HIF-1 signaling pathway	2	50	0.0412909	AKT3, VEGFA	4	96	6879	35.8281	0.945501	0.330545	0.330545
KEGG_PATHWAY	hsa04922:Glucagon signaling pathway	2	50	0.0425626	AKT3, FOXO1	4	99	6879	34.7424	0.95027	0.330545	0.330545
KEGG_PATHWAY	hsa04931:Insulin resistance	2	50	0.0463709	AKT3, FOXO1	4	108	6879	31.8472	0.962227	0.330545	0.330545
KEGG_PATHWAY	hsa04919:Thyroid hormone signaling pathway	2	50	0.0493259	AKT3, FOXO1	4	115	6879	29.9087	0.969508	0.330545	0.330545

## Sheet: cluster 4 predicted
Category	Term	Count	%	PValue	Genes	List Total	Pop Hits	Pop Total	Fold Enrichment	Bonferroni	Benjamini	FDR
UP_KEYWORDS	Polymorphism	7	100	0.0401222	WEE1, CCNE2, FBXW7, TDG, TET3, TET2, TET1	7	12043	20581	1.70896	0.828096	0.215657	0.19058
UP_KEYWORDS	Nucleus	6	85.7143	0.00506922	WEE1, CCNE2, FBXW7, TDG, TET3, TET1	7	5244	20581	3.36401	0.196301	0.0544942	0.0481576
GOTERM_CC_DIRECT	GO:0005634~nucleus	6	85.7143	0.0104447	WEE1, CCNE2, TDG, TET3, TET2, TET1	7	5415	18224	2.88469	0.127589	0.135781	0.135781
GOTERM_BP_DIRECT	GO:0080111~DNA demethylation	4	57.1429	1.41704e-08	TDG, TET3, TET2, TET1	7	16	16792	599.714	1.10529e-06	1.10529e-06	1.06278e-06
UP_KEYWORDS	Chromatin regulator	4	57.1429	5.20283e-05	TDG, TET3, TET2, TET1	7	287	20581	40.9776	0.00223477	0.00223722	0.00197707
UP_KEYWORDS	Ubl conjugation	4	57.1429	0.00937658	WEE1, FBXW7, TDG, TET3	7	1705	20581	6.8977	0.333087	0.0795724	0.0703198
UP_SEQ_FEATURE	mutagenesis site	4	57.1429	0.0201713	WEE1, CCNE2, TDG, TET1	7	2191	20063	5.23257	0.468315	0.215161	0.208437
GOTERM_CC_DIRECT	GO:0005654~nucleoplasm	4	57.1429	0.0496337	WEE1, CCNE2, FBXW7, TDG	7	2784	18224	3.74056	0.484079	0.322619	0.322619
INTERPRO	IPR024779:2OGFeDO domain, nucleic acid-modifying type	3	42.8571	2.61273e-07	TET3, TET2, TET1	7	3	18559	2651.29	4.96417e-06	4.96418e-06	4.96418e-06
GOTERM_BP_DIRECT	GO:0006211~5-methylcytosine catabolic process	3	42.8571	3.1915e-07	TET3, TET2, TET1	7	3	16792	2398.86	2.48934e-05	1.24468e-05	1.19681e-05
SMART	SM01333:SM01333	3	42.8571	5.93159e-07	TET3, TET2, TET1	6	3	10057	1676.17	3.55895e-06	3.55895e-06	3.55895e-06
GOTERM_MF_DIRECT	GO:0000907~sulfonate dioxygenase activity	3	42.8571	6.31487e-07	TET3, TET2, TET1	7	4	16881	1808.68	2.58907e-05	3.69871e-06	3.06722e-06
GOTERM_MF_DIRECT	GO:0018602~2,4-dichlorophenoxyacetate alpha-ketoglutarate dioxygenase activity	3	42.8571	6.31487e-07	TET3, TET2, TET1	7	4	16881	1808.68	2.58907e-05	3.69871e-06	3.06722e-06
GOTERM_MF_DIRECT	GO:0070579~methylcytosine dioxygenase activity	3	42.8571	6.31487e-07	TET3, TET2, TET1	7	4	16881	1808.68	2.58907e-05	3.69871e-06	3.06722e-06
GOTERM_MF_DIRECT	GO:0019798~procollagen-proline dioxygenase activity	3	42.8571	6.31487e-07	TET3, TET2, TET1	7	4	16881	1808.68	2.58907e-05	3.69871e-06	3.06722e-06
GOTERM_MF_DIRECT	GO:0034792~hypophosphite dioxygenase activity	3	42.8571	6.31487e-07	TET3, TET2, TET1	7	4	16881	1808.68	2.58907e-05	3.69871e-06	3.06722e-06
GOTERM_MF_DIRECT	GO:0052635~C-20 gibberellin 2-beta-dioxygenase activity	3	42.8571	6.31487e-07	TET3, TET2, TET1	7	4	16881	1808.68	2.58907e-05	3.69871e-06	3.06722e-06
GOTERM_MF_DIRECT	GO:0052634~C-19 gibberellin 2-beta-dioxygenase activity	3	42.8571	6.31487e-07	TET3, TET2, TET1	7	4	16881	1808.68	2.58907e-05	3.69871e-06	3.06722e-06
GOTERM_MF_DIRECT	GO:0043734~DNA-N1-methyladenine dioxygenase activity	3	42.8571	2.20916e-06	TET3, TET2, TET1	7	7	16881	1033.53	9.05715e-05	1.13219e-05	9.38892e-06
GOTERM_BP_DIRECT	GO:0019511~peptidyl-proline hydroxylation	3	42.8571	5.84365e-06	TET3, TET2, TET1	7	11	16792	654.234	0.000455702	0.00013672	0.000131461
UP_SEQ_FEATURE	binding site:2-oxoglutarate	3	42.8571	6.77173e-06	TET3, TET2, TET1	7	14	20063	614.173	0.000209902	0.000216695	0.000209924
GOTERM_BP_DIRECT	GO:0070989~oxidative demethylation	3	42.8571	7.01126e-06	TET3, TET2, TET1	7	12	16792	599.714	0.000546731	0.00013672	0.000131461
UP_SEQ_FEATURE	metal ion-binding site:Iron; catalytic	3	42.8571	2.22918e-05	TET3, TET2, TET1	7	25	20063	343.937	0.000690813	0.000356668	0.000345522
GOTERM_BP_DIRECT	GO:0006493~protein O-linked glycosylation	3	42.8571	5.25235e-05	TET3, TET2, TET1	7	32	16792	224.893	0.00408856	0.000819367	0.000787853
UP_KEYWORDS	Dioxygenase	3	42.8571	0.000238511	TET3, TET2, TET1	7	83	20581	106.27	0.0102048	0.00512799	0.00453171
UP_KEYWORDS	Iron	3	42.8571	0.00355423	TET3, TET2, TET1	7	324	20581	27.2235	0.14196	0.050944	0.0450203
UP_KEYWORDS	Oxidoreductase	3	42.8571	0.0111031	TET3, TET2, TET1	7	582	20581	15.1554	0.381282	0.0795724	0.0703198
UP_KEYWORDS	Cell cycle	3	42.8571	0.0137287	WEE1, CCNE2, TET2	7	650	20581	13.5699	0.44812	0.0843336	0.0745273
GOTERM_BP_DIRECT	GO:0045944~positive regulation of transcription from RNA polymerase II promoter	3	42.8571	0.0436981	TET3, TET2, TET1	7	981	16792	7.33595	0.969351	0.378717	0.364151
GOTERM_MF_DIRECT	GO:0043566~structure-specific DNA binding	2	28.5714	0.00248579	TDG, TET1	7	7	16881	689.02	0.0970106	0.0113242	0.00939078
INTERPRO	IPR002857:Zinc finger, CXXC-type	2	28.5714	0.00387377	TET3, TET1	7	12	18559	441.881	0.0710911	0.0368009	0.0368009
GOTERM_BP_DIRECT	GO:0080182~histone H3-K4 trimethylation	2	28.5714	0.00534853	TET3, TET2	7	15	16792	319.848	0.341839	0.0695309	0.0668567
GOTERM_BP_DIRECT	GO:0016569~covalent chromatin modification	2	28.5714	0.039709	TDG, TET1	7	113	16792	42.4576	0.957594	0.378717	0.364151
GOTERM_BP_DIRECT	GO:0051726~regulation of cell cycle	2	28.5714	0.0435032	WEE1, CCNE2	7	124	16792	38.6912	0.96886	0.378717	0.364151

## Sheet:  cluster 5 predicted
Category	Term	Count	%	PValue	Genes	List Total	Pop Hits	Pop Total	Fold Enrichment	Bonferroni	Benjamini	FDR
UP_KEYWORDS	Coiled coil	3	100	0.0217545	SCN9A, NAV1, SCN2A	3	3036	20581	6.77899	0.483065	0.108772	0.0978951
INTERPRO	IPR024583:Domain of unknown function DUF3451	2	66.6667	0.000646499	SCN9A, SCN2A	3	6	18559	2062.11	0.00516031	0.00287302	0.00287302
INTERPRO	IPR001696:Voltage gated sodium channel, alpha subunit	2	66.6667	0.00107738	SCN9A, SCN2A	3	10	18559	1237.27	0.00858663	0.00287302	0.00287302
INTERPRO	IPR010526:Sodium ion transport-associated	2	66.6667	0.00107738	SCN9A, SCN2A	3	10	18559	1237.27	0.00858663	0.00287302	0.00287302
GOTERM_MF_DIRECT	GO:0005248~voltage-gated sodium channel activity	2	66.6667	0.00118476	SCN9A, SCN2A	2	20	16881	844.05	0.00355008	0.00355429	0.00355429
GOTERM_CC_DIRECT	GO:0001518~voltage-gated sodium channel complex	2	66.6667	0.00153589	SCN9A, SCN2A	3	14	18224	867.81	0.0152532	0.0153589	0.0153589
UP_SEQ_FEATURE	repeat:IV	2	66.6667	0.00259022	SCN9A, SCN2A	3	26	20063	514.436	0.0281263	0.00777066	0.005828
UP_SEQ_FEATURE	repeat:II	2	66.6667	0.00259022	SCN9A, SCN2A	3	26	20063	514.436	0.0281263	0.00777066	0.005828
UP_SEQ_FEATURE	repeat:I	2	66.6667	0.00259022	SCN9A, SCN2A	3	26	20063	514.436	0.0281263	0.00777066	0.005828
UP_SEQ_FEATURE	repeat:III	2	66.6667	0.00259022	SCN9A, SCN2A	3	26	20063	514.436	0.0281263	0.00777066	0.005828
GOTERM_BP_DIRECT	GO:0060078~regulation of postsynaptic membrane potential	2	66.6667	0.00261866	SCN9A, SCN2A	3	22	16792	508.848	0.0385679	0.0155505	0.0155505
UP_KEYWORDS	Sodium channel	2	66.6667	0.00281622	SCN9A, SCN2A	3	29	20581	473.126	0.0811255	0.0844865	0.0760378
GOTERM_BP_DIRECT	GO:0086010~membrane depolarization during action potential	2	66.6667	0.00333224	SCN9A, SCN2A	3	28	16792	399.81	0.0488344	0.0155505	0.0155505
GOTERM_BP_DIRECT	GO:0019228~neuronal action potential	2	66.6667	0.00333224	SCN9A, SCN2A	3	28	16792	399.81	0.0488344	0.0155505	0.0155505
INTERPRO	IPR027359:Voltage-dependent potassium channel, four helix bundle domain	2	66.6667	0.00591842	SCN9A, SCN2A	3	55	18559	224.958	0.0463781	0.0118368	0.0118368
UP_SEQ_FEATURE	domain:IQ	2	66.6667	0.00607175	SCN9A, SCN2A	3	61	20063	219.268	0.0647981	0.0145722	0.0109292
GOTERM_BP_DIRECT	GO:0035725~sodium ion transmembrane transport	2	66.6667	0.00867598	SCN9A, SCN2A	3	73	16792	153.352	0.122526	0.0269485	0.0269485
INTERPRO	IPR000048:IQ motif, EF-hand binding site	2	66.6667	0.00935378	SCN9A, SCN2A	3	87	18559	142.215	0.0724257	0.0149661	0.0149661
GOTERM_BP_DIRECT	GO:0006814~sodium ion transport	2	66.6667	0.00962447	SCN9A, SCN2A	3	81	16792	138.206	0.135035	0.0269485	0.0269485
SMART	SM00015:IQ	2	66.6667	0.0103148	SCN9A, SCN2A	3	52	10057	128.936	0.0205233	0.0206297	0.0206297
UP_KEYWORDS	Sodium transport	2	66.6667	0.0113377	SCN9A, SCN2A	3	117	20581	117.271	0.289704	0.0871427	0.0784284
INTERPRO	IPR005821:Ion transport domain	2	66.6667	0.0113907	SCN9A, SCN2A	3	106	18559	116.723	0.0875744	0.0151876	0.0151876
UP_KEYWORDS	Sodium	2	66.6667	0.0120139	SCN9A, SCN2A	3	124	20581	110.651	0.304136	0.0871427	0.0784284
UP_KEYWORDS	Epilepsy	2	66.6667	0.0123037	SCN9A, SCN2A	3	127	20581	108.037	0.310232	0.0871427	0.0784284
GOTERM_BP_DIRECT	GO:0034765~regulation of ion transmembrane transport	2	66.6667	0.0131773	SCN9A, SCN2A	3	111	16792	100.853	0.180428	0.030747	0.030747
UP_KEYWORDS	Voltage-gated channel	2	66.6667	0.0145238	SCN9A, SCN2A	3	150	20581	91.4711	0.35526	0.0871427	0.0784284
UP_KEYWORDS	Ion channel	2	66.6667	0.0345831	SCN9A, SCN2A	3	359	20581	38.2191	0.652106	0.148213	0.133392

## Sheet: cluster 6 predicted
Category	Term	Count	%	PValue	Genes	List Total	Pop Hits	Pop Total	Fold Enrichment	Bonferroni	Benjamini	FDR
GOTERM_MF_DIRECT	GO:0005515~protein binding	7	100	0.0198475	KITLG, SOCS1, AGO4, TRA2B, PTEN, SRSF7, QKI	7	8785	16881	1.92157	0.523717	0.690254	0.690254
GOTERM_CC_DIRECT	GO:0005737~cytoplasm	6	85.7143	0.00881297	KITLG, SOCS1, AGO4, PTEN, SRSF7, QKI	7	5222	18224	2.9913	0.239982	0.161893	0.161893
GOTERM_CC_DIRECT	GO:0005634~nucleus	6	85.7143	0.0104447	SOCS1, AGO4, TRA2B, PTEN, SRSF7, QKI	7	5415	18224	2.88469	0.277825	0.161893	0.161893
UP_KEYWORDS	Cytoplasm	5	71.4286	0.029758	KITLG, AGO4, PTEN, SRSF7, QKI	7	4816	20581	3.05247	0.80433	0.274597	0.269512
UP_KEYWORDS	Nucleus	5	71.4286	0.0401618	SOCS1, TRA2B, PTEN, SRSF7, QKI	7	5244	20581	2.80334	0.890681	0.30982	0.304082
UP_KEYWORDS	RNA-binding	4	57.1429	0.00062435	AGO4, TRA2B, SRSF7, QKI	7	665	20581	17.6851	0.0331631	0.0337149	0.0330905
GOTERM_BP_DIRECT	GO:0048015~phosphatidylinositol-mediated signaling	3	42.8571	0.000582404	KITLG, AGO4, PTEN	7	106	16792	67.8922	0.0932353	0.0978438	0.0978438
UP_KEYWORDS	mRNA splicing	3	42.8571	0.00230619	TRA2B, SRSF7, QKI	7	260	20581	33.9247	0.117219	0.062267	0.061114
UP_KEYWORDS	mRNA processing	3	42.8571	0.0037283	TRA2B, SRSF7, QKI	7	332	20581	26.5676	0.182664	0.0671095	0.0658667
GOTERM_BP_DIRECT	GO:0048025~negative regulation of mRNA splicing, via spliceosome	2	28.5714	0.00748126	TRA2B, SRSF7	7	21	16792	228.463	0.716793	0.628426	0.628426
UP_KEYWORDS	Translation regulation	2	28.5714	0.0302266	AGO4, QKI	7	105	20581	56.0027	0.809369	0.274597	0.269512
UP_KEYWORDS	mRNA transport	2	28.5714	0.0305108	SRSF7, QKI	7	106	20581	55.4744	0.812362	0.274597	0.269512
GOTERM_BP_DIRECT	GO:0008584~male gonad development	2	28.5714	0.0331257	KITLG, AGO4	7	94	16792	51.0395	0.996515	1	1
UP_SEQ_FEATURE	domain:RRM	2	28.5714	0.0397046	TRA2B, SRSF7	7	135	20063	42.4614	0.844896	1	1
GOTERM_MF_DIRECT	GO:0003729~mRNA binding	2	28.5714	0.0436206	TRA2B, QKI	7	125	16881	38.5851	0.807993	0.690254	0.690254
